# Supplementary material for: Sequential Acquisition of Virulence and Fluoroquinolone Resistance Has Shaped the Evolution of Escherichia coli ST131
Source: PubMed Central journal article supplement (PMC4850260; doi:10.1128/mbio.00347-16), 2016-04-26
Supplement: mbo002162781sf2.pdf [file mbo002162781sf2.pdf]

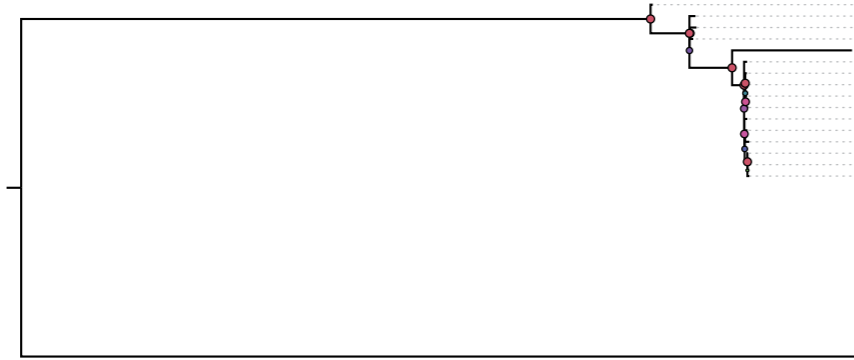

SE15  
S27  
S32  
S36  
S37  
S38  
S39  
S40  
S41  
S42  
S43  
S44  
S45  
S46  
S47  
S48  
S49  
S50  
S51  
S52  
S53  
S54  
S55  
S56  
S57  
S58  
S59  
S60  
S61  
S62  
S63  
S64  
S65  
S66  
S67  
S68  
S69  
S70  
S71  
S72  
S73  
S74  
S75  
S76  
S77  
S78  
S79  
S80  
S81  
S82  
S83  
S84  
S85  
S86  
S87  
S88  
S89  
S90  
S91  
S92  
S93  
S94  
S95  
S96  
S97  
S98  
S99  
S100

H17  
CO471  
S115  
S116  
S117  
S118  
S119  
S120  
S121  
S122  
S123  
S124  
S125  
S126  
S127  
S128  
S129  
S130  
S131  
S132  
S133  
S134  
S135  
S136  
S137  
S138  
S139  
S140  
S141  
S142  
S143  
S144  
S145  
S146  
S147  
S148  
S149  
S150  
S151  
S152  
S153  
S154  
S155  
S156  
S157  
S158  
S159  
S160  
S161  
S162  
S163  
S164  
S165  
S166  
S167  
S168  
S169  
S170  
S171  
S172  
S173  
S174  
S175  
S176  
S177  
S178  
S179  
S180  
S181  
S182  
S183  
S184  
S185  
S186  
S187  
S188  
S189  
S190  
S191  
S192  
S193  
S194  
S195  
S196  
S197  
S198  
S199  
S200

S115  
S116  
S117  
S118  
S119  
S120  
S121  
S122  
S123  
S124  
S125  
S126  
S127  
S128  
S129  
S130  
S131  
S132  
S133  
S134  
S135  
S136  
S137  
S138  
S139  
S140  
S141  
S142  
S143  
S144  
S145  
S146  
S147  
S148  
S149  
S150  
S151  
S152  
S153  
S154  
S155  
S156  
S157  
S158  
S159  
S160  
S161  
S162  
S163  
S164  
S165  
S166  
S167  
S168  
S169  
S170  
S171  
S172  
S173  
S174  
S175  
S176  
S177  
S178  
S179  
S180  
S181  
S182  
S183  
S184  
S185  
S186  
S187  
S188  
S189  
S190  
S191  
S192  
S193  
S194  
S195  
S196  
S197  
S198  
S199  
S200

A

1000.0

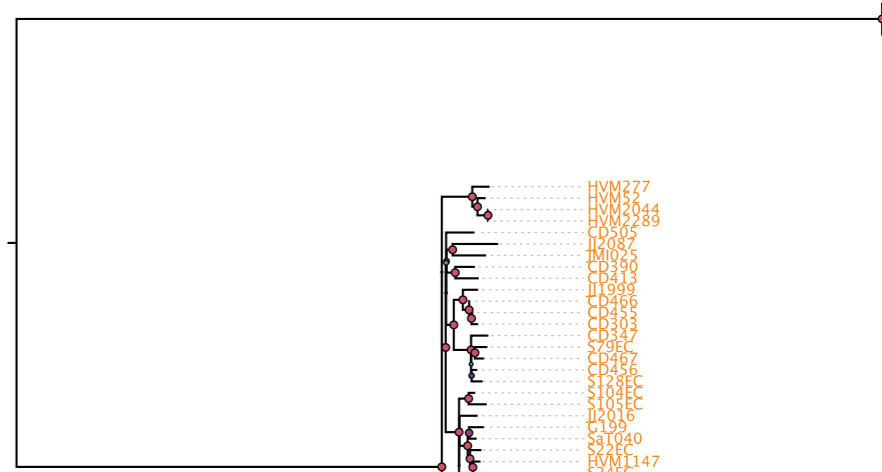

SE15  
S27  
S32  
S36  
S37  
S38  
S39  
S40  
S41  
S42  
S43  
S44  
S45  
S46  
S47  
S48  
S49  
S50  
S51  
S52  
S53  
S54  
S55  
S56  
S57  
S58  
S59  
S60  
S61  
S62  
S63  
S64  
S65  
S66  
S67  
S68  
S69  
S70  
S71  
S72  
S73  
S74  
S75  
S76  
S77  
S78  
S79  
S80  
S81  
S82  
S83  
S84  
S85  
S86  
S87  
S88  
S89  
S90  
S91  
S92  
S93  
S94  
S95  
S96  
S97  
S98  
S99  
S100

HVM277  
HVM282  
HVM284  
HVM285  
HVM286  
HVM287  
HVM288  
HVM289  
HVM290  
HVM291  
HVM292  
HVM293  
HVM294  
HVM295  
HVM296  
HVM297  
HVM298  
HVM299  
HVM300  
HVM301  
HVM302  
HVM303  
HVM304  
HVM305  
HVM306  
HVM307  
HVM308  
HVM309  
HVM310  
HVM311  
HVM312  
HVM313  
HVM314  
HVM315  
HVM316  
HVM317  
HVM318  
HVM319  
HVM320  
HVM321  
HVM322  
HVM323  
HVM324  
HVM325  
HVM326  
HVM327  
HVM328  
HVM329  
HVM330  
HVM331  
HVM332  
HVM333  
HVM334  
HVM335  
HVM336  
HVM337  
HVM338  
HVM339  
HVM340  
HVM341  
HVM342  
HVM343  
HVM344  
HVM345  
HVM346  
HVM347  
HVM348  
HVM349  
HVM350  
HVM351  
HVM352  
HVM353  
HVM354  
HVM355  
HVM356  
HVM357  
HVM358  
HVM359  
HVM360  
HVM361  
HVM362  
HVM363  
HVM364  
HVM365  
HVM366  
HVM367  
HVM368  
HVM369  
HVM370  
HVM371  
HVM372  
HVM373  
HVM374  
HVM375  
HVM376  
HVM377  
HVM378  
HVM379  
HVM380  
HVM381  
HVM382  
HVM383  
HVM384  
HVM385  
HVM386  
HVM387  
HVM388  
HVM389  
HVM390  
HVM391  
HVM392  
HVM393  
HVM394  
HVM395  
HVM396  
HVM397  
HVM398  
HVM399  
HVM400  
HVM401  
HVM402  
HVM403  
HVM404  
HVM405  
HVM406  
HVM407  
HVM408  
HVM409  
HVM410  
HVM411  
HVM412  
HVM413  
HVM414  
HVM415  
HVM416  
HVM417  
HVM418  
HVM419  
HVM420  
HVM421  
HVM422  
HVM423  
HVM424  
HVM425  
HVM426  
HVM427  
HVM428  
HVM429  
HVM430  
HVM431  
HVM432  
HVM433  
HVM434  
HVM435  
HVM436  
HVM437  
HVM438  
HVM439  
HVM440  
HVM441  
HVM442  
HVM443  
HVM444  
HVM445  
HVM446  
HVM447  
HVM448  
HVM449  
HVM450  
HVM451  
HVM452  
HVM453  
HVM454  
HVM455  
HVM456  
HVM457  
HVM458  
HVM459  
HVM460  
HVM461  
HVM462  
HVM463  
HVM464  
HVM465  
HVM466  
HVM467  
HVM468  
HVM469  
HVM470  
HVM471  
HVM472  
HVM473  
HVM474  
HVM475  
HVM476  
HVM477  
HVM478  
HVM479  
HVM480  
HVM481  
HVM482  
HVM483  
HVM484  
HVM485  
HVM486  
HVM487  
HVM488  
HVM489  
HVM490  
HVM491  
HVM492  
HVM493  
HVM494  
HVM495  
HVM496  
HVM497  
HVM498  
HVM499  
HVM500

B

250.0
