# Supplementary material for: Sequential Acquisition of Virulence and Fluoroquinolone Resistance Has Shaped the Evolution of Escherichia coli ST131
Source: PubMed Central journal article supplement (PMC4850260; doi:10.1128/mbio.00347-16), 2016-04-26

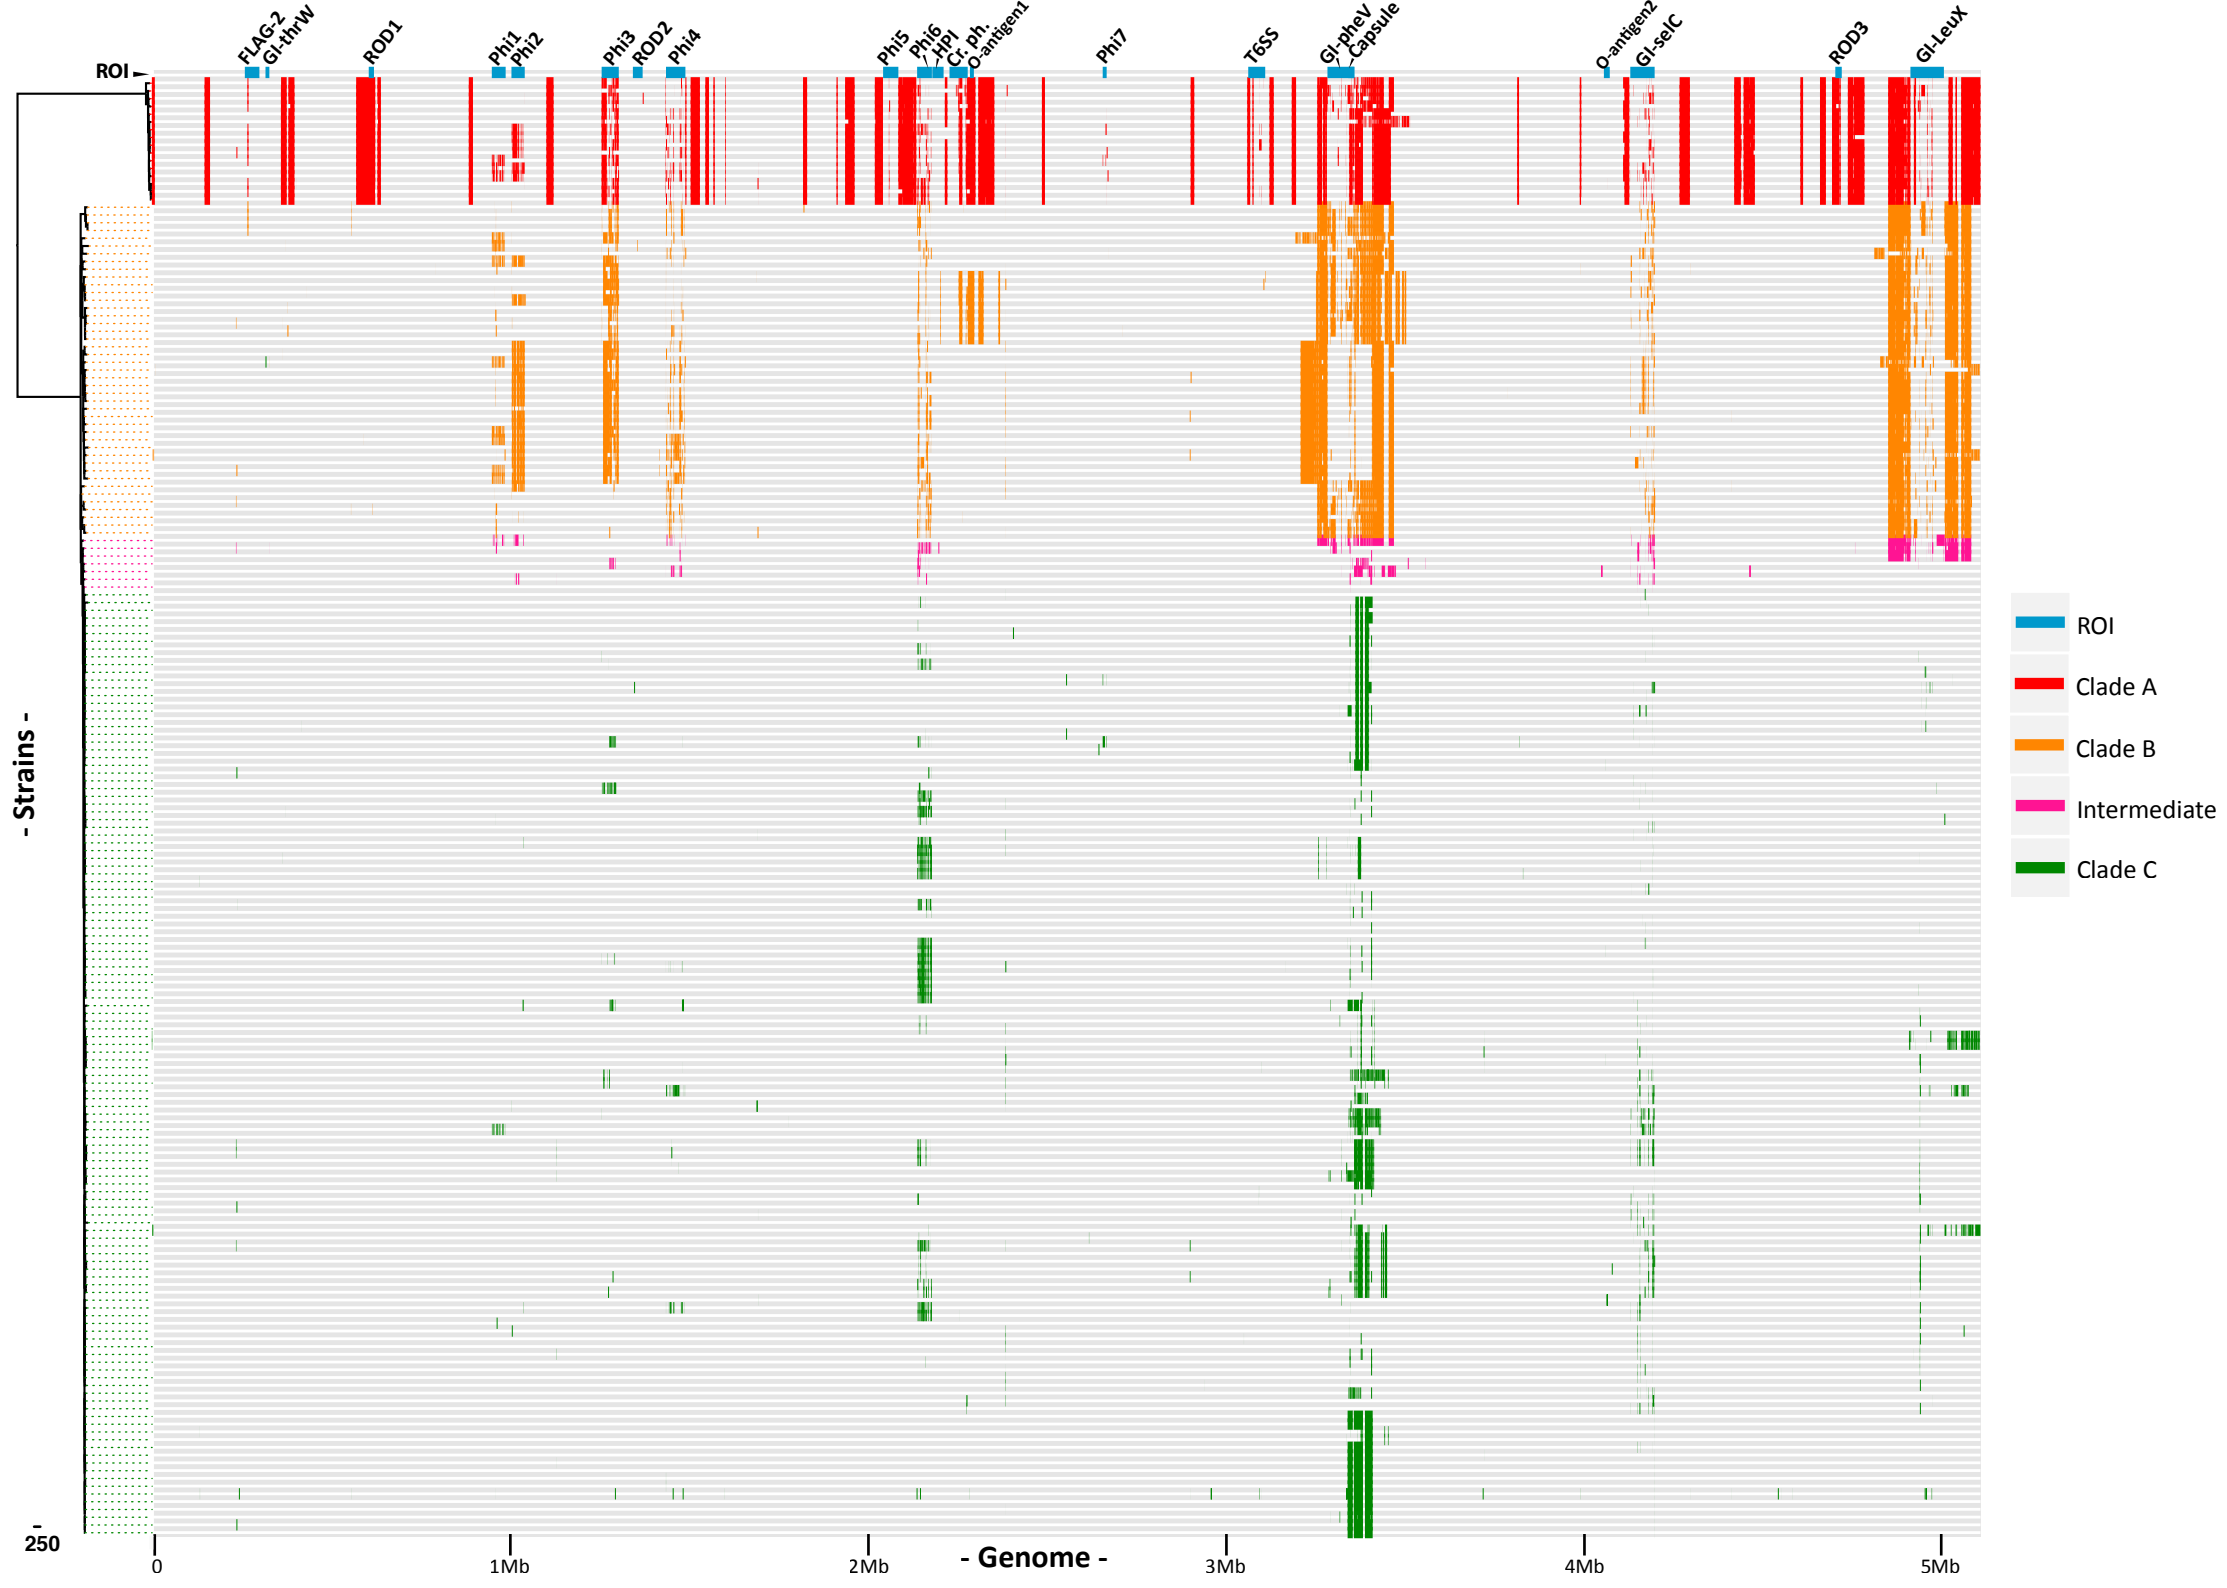

Supplement: mbo002162781sf4.pdf [file mbo002162781sf4.pdf]
