# Supplementary material for: Sequential Acquisition of Virulence and Fluoroquinolone Resistance Has Shaped the Evolution of Escherichia coli ST131
Source: PubMed Central journal article supplement (PMC4850260; doi:10.1128/mbio.00347-16), 2016-04-26

Flag-2  
 GI-hhrW  
 ROD 1  
 Phi 1  
 Phi 2  
 Phi 3  
 ROD 2  
 Phi 4  
 Phi 5  
 Phi 6  
 HPI  
 cryptic  
 propage  
 O antigen  
 Phi 7  
 rfaA like  
 region  
 T6SS  
 GI-pheV  
 capsule  
 O-antigen 2  
 GI-selC  
 ROD 3  
 GI-leuX

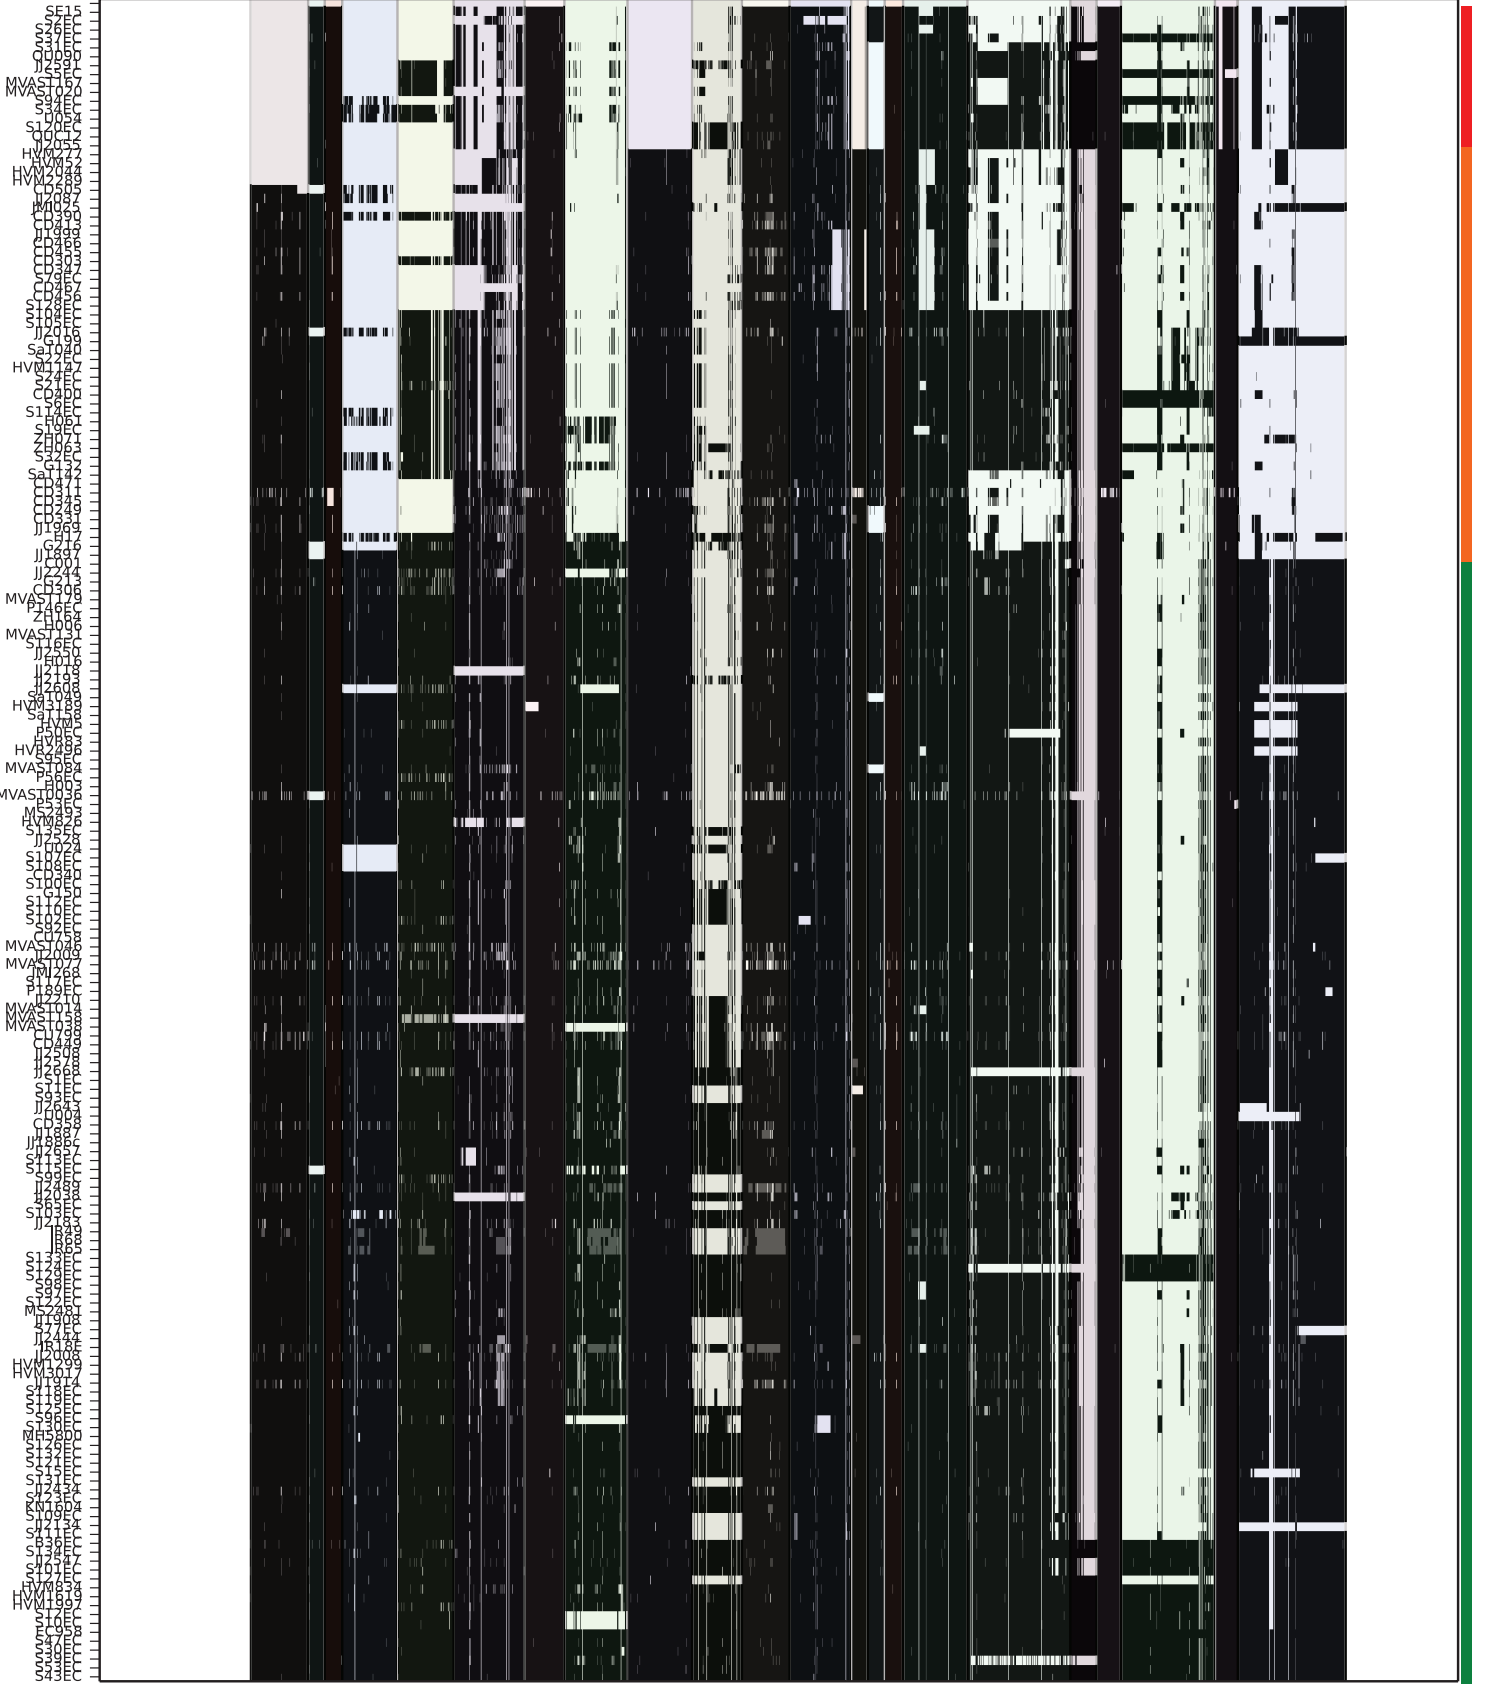

Supplement: mbo002162781sf6.pdf [file mbo002162781sf6.pdf]
