# Supplementary material for: Sequential Acquisition of Virulence and Fluoroquinolone Resistance Has Shaped the Evolution of Escherichia coli ST131
Source: PubMed Central journal article supplement (PMC4850260; doi:10.1128/mbio.00347-16), 2016-04-26
Supplement: mbo002162781sf9.pdf [file mbo002162781sf9.pdf]

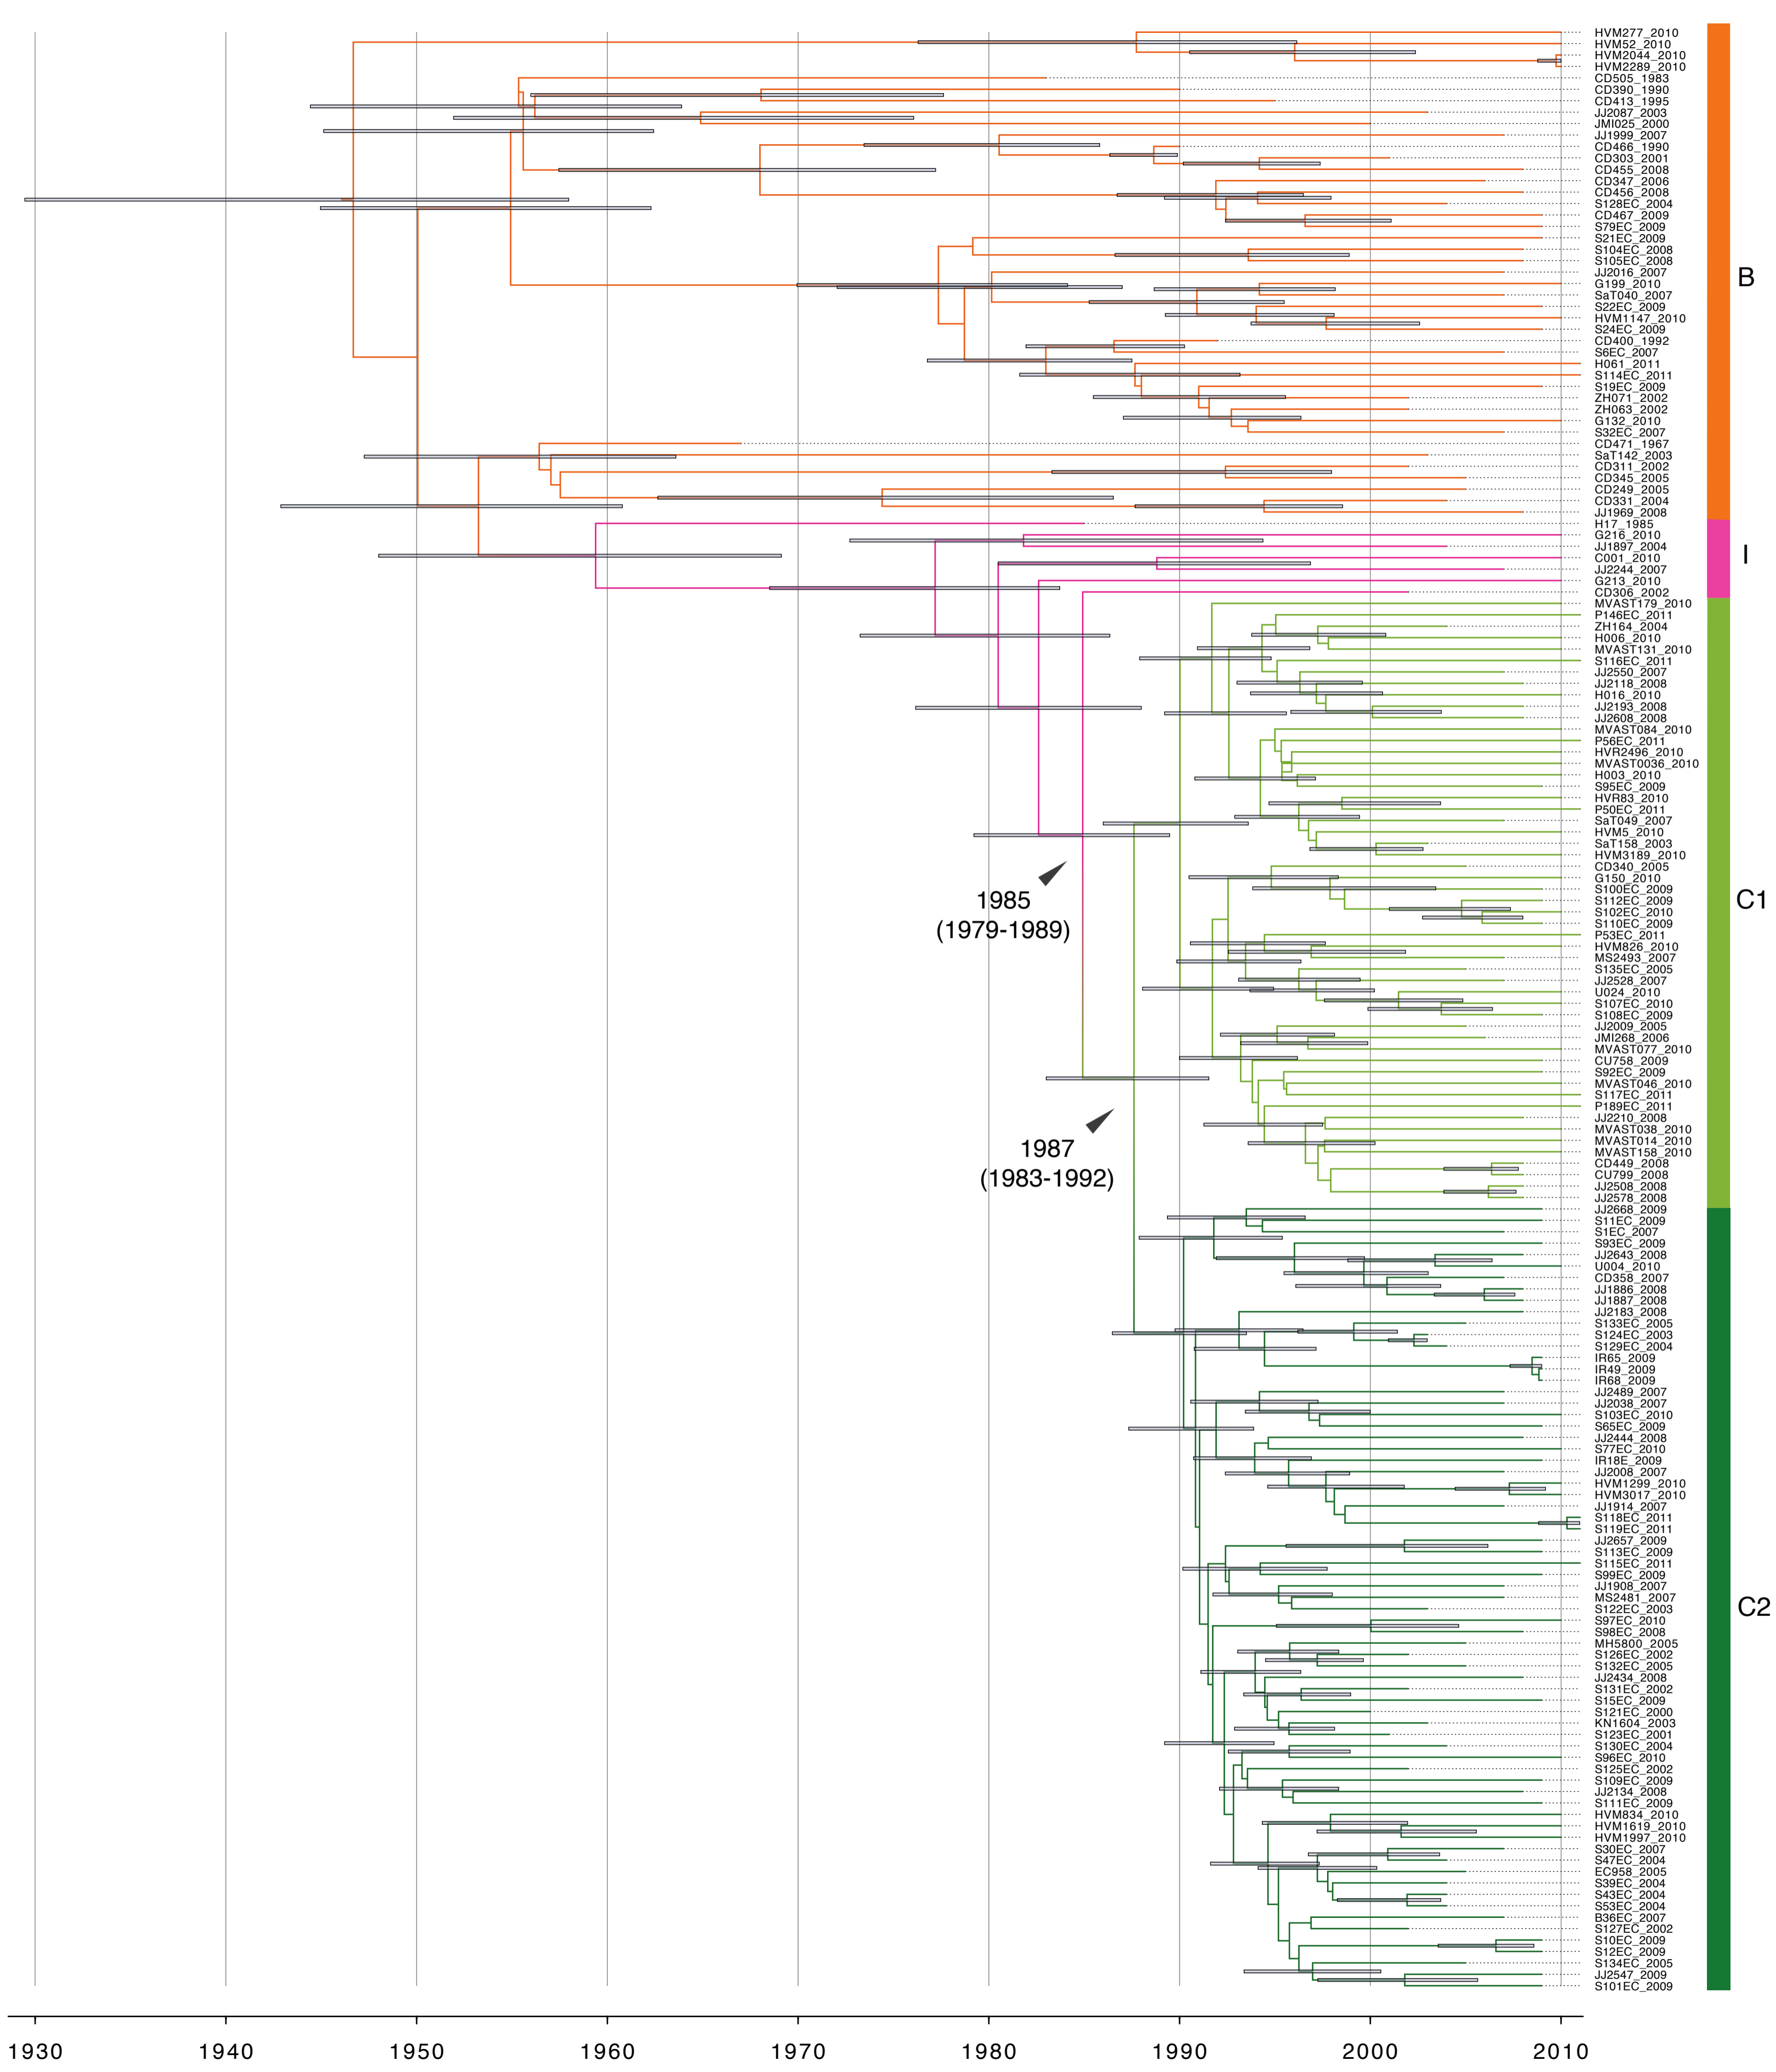

- HVM277\_2010
- HVM52\_2010
- HVM2044\_2010
- HVM2289\_2010
- CD505\_1983
- CD390\_1990
- CD413\_1995
- JJ2087\_2003
- JM1025\_2000
- JJ1999\_2007
- CD466\_1990
- CD303\_2001
- CD455\_2008
- CD347\_2006
- CD456\_2008
- S128EC\_2004
- CD467\_2009
- S79EC\_2009
- S21EC\_2009
- S104EC\_2008
- S105EC\_2008
- JJ2016\_2007
- S199\_2010
- Sa1040\_2007
- S22EC\_2009
- HVM1147\_2010
- S24EC\_2009
- CD400\_1992
- S6EC\_2007
- H061\_2011
- S114EC\_2011
- S19EC\_2009
- ZH071\_2002
- ZH063\_2002
- G132\_2010
- S02EC\_2007
- CD471\_1987
- SaT142\_2003
- CD311\_2002
- CD345\_2005
- CD249\_2005
- CD331\_2004
- JJ1969\_2008
- H17\_1985
- G216\_2010
- JJ1897\_2004
- C001\_2010
- JJ2244\_2007
- G213\_2010
- CD306\_2002
- MVAST179\_2010
- P146EC\_2011
- ZH164\_2004
- H006\_2010
- MVAST131\_2010
- S116EC\_2011
- JJ2550\_2007
- JJ2118\_2008
- H016\_2010
- JJ2193\_2008
- JJ2608\_2008
- MVAST084\_2010
- P56EC\_2011
- HVR2496\_2010
- MVAST0036\_2010
- H003\_2010
- S95EC\_2009
- HVR83\_2010
- P50EC\_2011
- SaT049\_2007
- HVM5\_2010
- SaT158\_2003
- HVM3189\_2010
- CD340\_2005
- G150\_2010
- S100EC\_2009
- S112EC\_2009
- S102EC\_2010
- S110EC\_2009
- P53EC\_2011
- HVM826\_2010
- MS2493\_2007
- S135EC\_2005
- JJ2528\_2007
- U024\_2010
- S107EC\_2010
- S108EC\_2009
- JJ2009\_2005
- JM1268\_2006
- MVAST077\_2010
- CJ158\_2009
- S92EC\_2009
- MVAST046\_2010
- S117EC\_2011
- P189EC\_2011
- JJ2210\_2008
- MVAST038\_2010
- MVAST014\_2010
- MVAST158\_2010
- CD449\_2008
- CU799\_2008
- JJ2508\_2008
- JJ2578\_2008
- JJ2668\_2009
- S11EC\_2009
- S1EC\_2007
- S93EC\_2009
- JJ2643\_2008
- U004\_2010
- CD358\_2007
- JJ1886\_2008
- JJ1887\_2008
- JJ2183\_2008
- S133EC\_2005
- S124EC\_2003
- S129EC\_2004
- IR65\_2008
- IR49\_2009
- IR68\_2009
- JJ2489\_2007
- JJ2038\_2007
- S103EC\_2010
- S65EC\_2009
- JJ2444\_2008
- S77EC\_2010
- IR18E\_2009
- JJ2008\_2007
- HVM1299\_2010
- HVM3017\_2010
- JJ1914\_2007
- S119EC\_2011
- S119EC\_2011
- JJ2657\_2009
- S113EC\_2009
- S115EC\_2011
- S99EC\_2009
- JJ1908\_2007
- MS2481\_2007
- S122EC\_2003
- S97EC\_2010
- S98EC\_2008
- MH5800\_2005
- S126EC\_2002
- S132EC\_2005
- JJ2434\_2008
- S131EC\_2002
- S15EC\_2009
- S121EC\_2000
- KN1604\_2003
- S123EC\_2001
- S130EC\_2004
- S96EC\_2010
- S125EC\_2002
- S109EC\_2009
- JJ2134\_2008
- S111EC\_2009
- HVM834\_2010
- HVM1619\_2010
- HVM1997\_2010
- S30EC\_2007
- S47EC\_2004
- EC958\_2005
- S39EC\_2004
- S43EC\_2004
- S53EC\_2004
- B36EC\_2007
- S127EC\_2002
- S10EC\_2009
- S12EC\_2009
- S134EC\_2005
- JJ2547\_2009
- S101EC\_2009

B

I

C1

C2

1985  
(1979-1989)

1987  
(1983-1992)

1930 1940 1950 1960 1970 1980 1990 2000 2010
